# Supplementary material for: External Validation and Retraining of DeepBleed: The First Open-Source 3D Deep Learning Network for the Segmentation of Spontaneous Intracerebral and Intraventricular Hemorrhage
Source: MDPI journal article supplement (doi:10.3390/jcm12124005), 2023-06-12
Supplement: s1 [file s1]

ANCOVA analysis on the OM showed that hemorrhage volume had an effect on the DSC ( $F=39.8$ ,  $p<0.0001$ ), PPV ( $F=4.8$ ,  $p<0.0001$ ) and sensitivity ( $F=4.6$ ,  $p<0.0001$ ). Only the DSC was significantly influenced by location ( $F=39.9$ ,  $p<0.0001$ ). There was no significant effect of IVH presence on metrics, while database had a significant effect on PPV ( $F=6.8$ ,  $p<0.001$ ).

**Supplementary Table S1.** Original and retrained model performance metrics.

Model Performance across the original (OM) and retrained (RM) DeepBleed models. All datasets and hemorrhage locations were evaluated for dice scores (DSC), sensitivity, and positive predictive value (PPV) and are given as mean with standard deviation.

| OM                                     |       |      |         | RM    |      |         |
|----------------------------------------|-------|------|---------|-------|------|---------|
| Parameter                              | Slope | SD   | p-value | Slope | SD   | p-value |
| Location (in respect to deep location) |       |      |         |       |      |         |
| Intercept                              | 0.81  | 0.01 | <0.001  | 0.82  | 0.01 | <0.001  |
| Lobar                                  | -0.02 | 0.01 | 0.09    | -0.06 | 0.01 | <0.001  |
| Brainstem                              | -0.23 | 0.03 | <0.001  | -0.20 | 0.02 | <0.001  |
| Cerebellum                             | -0.37 | 0.02 | <0.001  | -0.11 | 0.02 | <0.001  |
| Volume (mm³)                           |       |      |         |       |      |         |

|                                          |      |      |        |       |      |        |
|------------------------------------------|------|------|--------|-------|------|--------|
| <b>Intercept</b>                         | 0.67 | 0.01 | <0.001 | 0.73  | 0.01 | <0.001 |
| <b>Volume</b>                            | 0.00 | 0.00 | <0.001 | 0.00  | 0.00 | <0.001 |
| <b>IVH Presence</b>                      |      |      |        |       |      |        |
| <b>Intercept</b>                         | 0.71 | 0.01 | <0.001 | 0.74  | 0.01 | <0.001 |
| <b>IVH Presence</b>                      | 0.08 | 0.01 | <0.001 | 0.06  | 0.01 | <0.001 |
| <b>Center (in respect to Berlin, DE)</b> |      |      |        |       |      |        |
| <b>Intercept</b>                         | 0.75 | 0.01 | <0.001 | 0.77  | 0.01 | <0.001 |
| <b>Hamburg, DE</b>                       | 0.02 | 0.02 | 0.27   | -0.02 | 0.01 | 0.30   |
| <b>Pavia, IT</b>                         | 0.02 | 0.03 | 0.52   | -0.01 | 0.02 | 0.65   |

Univariate linear regression analysis on variables influencing the model performance in the original (OM) and retrained (RM) DeepBleed model. DE, Germany; IT, Italy; IVH, intraventricular hemorrhage; SD, standard deviation.
